# Supplementary material for: Ambulatory Medication Reconciliation and Frequency of Hospitalizations and Emergency Department Visits in Patients With Diabetes
Source: Oxford University Press journal article supplement (doi:10.2337/dc17-1260), 2018-06-11
Supplement: dc171260supplementarydata.pdf [file dc171260supplementarydata.pdf]

SUPPLEMENTARY DATA

**Supplementary Table 1.**

Characteristics of reconciliation assessment periods

| <b>Variable</b>                                              | <b>Value</b>   |
|--------------------------------------------------------------|----------------|
| Number of periods in the analysis                            | 261,765        |
| Primary care visits per patient                              | 5.7 (4.9)      |
| Hospital admissions per patient in the preceding 12 months   | 0.26 (0.78)    |
| Number of diabetes medications per patient                   | 1.7 (0.78)     |
| Diabetes medications reconciled                              |                |
| None, N (%)                                                  | 57,716 (22.1)  |
| Some, N (%)                                                  | 27,775 (10.6)  |
| All, N (%)                                                   | 176,274 (67.3) |
| Hospital admissions per patient over the subsequent 6 months | 0.14 (0.52)    |
| ED visits per patient over the subsequent 6 months           | 0.23 (0.74)    |

Values are means (SD), unless stated otherwise
